# Supplementary material
Source: PubMed Central journal article supplement (PMC4432149)
Supplement: AAC.04669-14_zac006154036so1.pdf [file AAC.04669-14_zac006154036so1.pdf]

## Supplemental materials

### **PBP1a/LpoA but not PBP1b/LpoB are involved in regulation of the major $\beta$ -lactamase gene *blaA* in *Shewanella oneidensis***

Jianhua Yin,<sup>a,b</sup> Yiyang Sun,<sup>a,b</sup> Yinting Mao,<sup>a,b</sup> Miao Jin,<sup>a,b</sup> Haichun Gao<sup>a,b\*</sup>

<sup>a</sup>Institute of Microbiology and College of Life Sciences, Zhejiang University, Hangzhou, Zhejiang, 310058, China

<sup>b</sup>Key Laboratory for Agro-Microbial Research and Utilization, Zhejiang Province Hangzhou, Zhejiang, 310058, China

**WT/P<sub>blaA</sub>-lacZ**

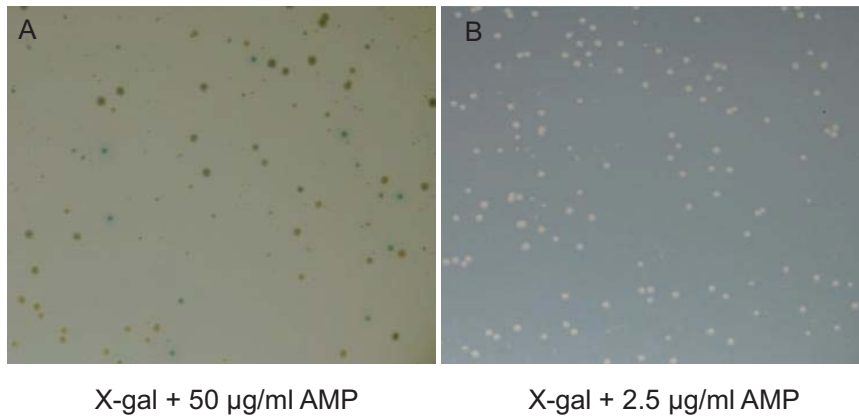

**FIG S1** Phenotype of the parent strain (WT/P<sub>blaA</sub>-lacZ) for transposon mutagenesis. Blue-colony phenotype was observed on LB medium containing X-gal and ampicillin at 50 µg/ml (A), but not 2.5 µg/ml (B).

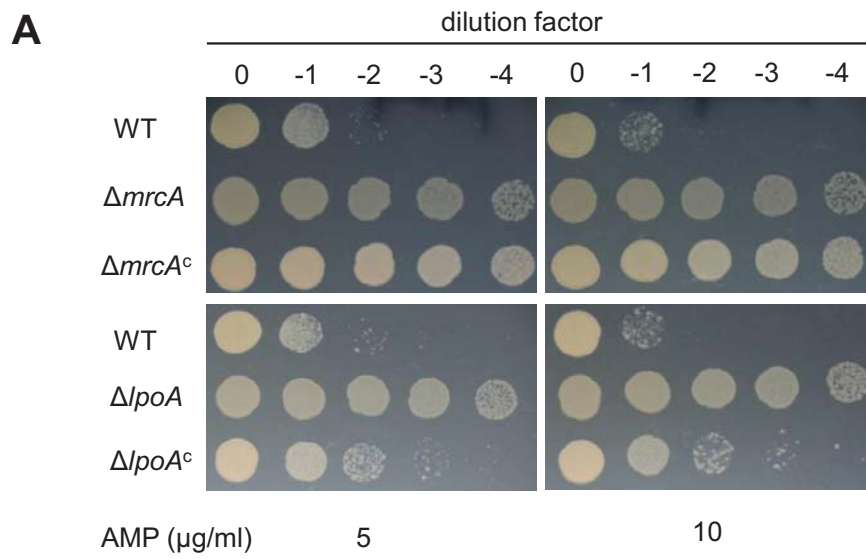

**FIG S2** Ampicillin susceptibility assay for *mrcA* and *lpoA* complemented strains.  $\Delta mrcA^c$  and  $\Delta lpoA^c$  represent  $\Delta mrcA$  and  $\Delta lpoA$  that were complemented with pHG101 *in trans*, respectively.

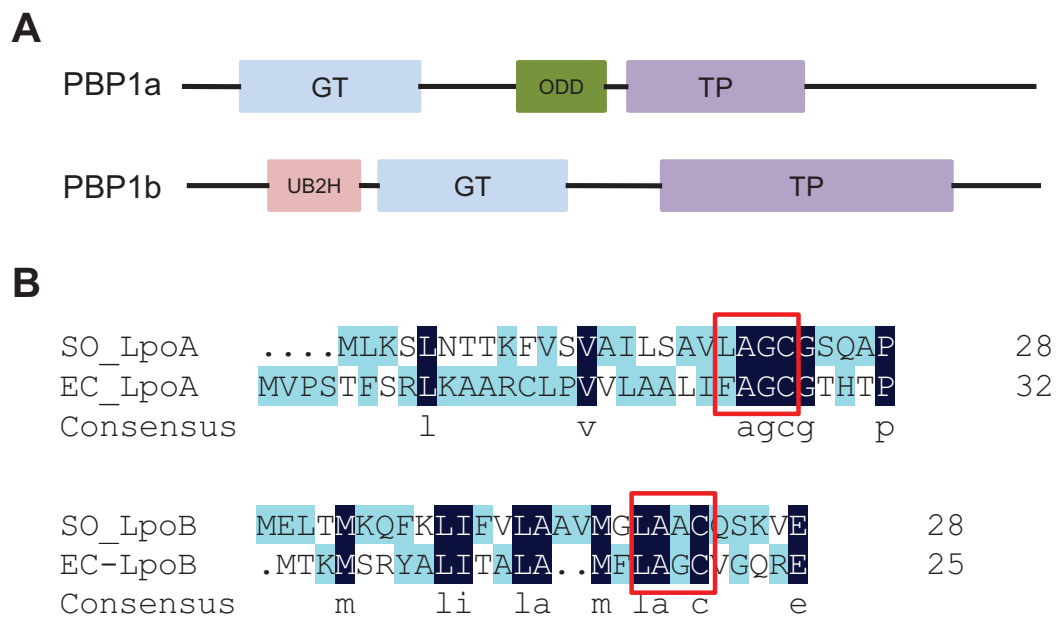

**FIG S3** Bioinformatics analysis of the *S. oneidensis* PBP/Lpo proteins. (A) Schematic representation for conserved domains of PBP1a and PBP1b, which were analyzed by the online tool InterProScan 5 (<http://www.ebi.ac.uk/Tools/pfa/iprscan5/>). (B) Sequence alignment of the Lpo proteins between *S. oneidensis* and *E. coli*. The boxes indicate the lipobox motif of lipoprotein, which has a consensus sequence L(A/S)(G/A)C.
